# Supplementary material
Source: Springer Nature journal article supplement (https://www.springermedizin.de/resource/supplementary/12967_2011_769_MOESM2_ESM.pdf/9577474)

## HAEC

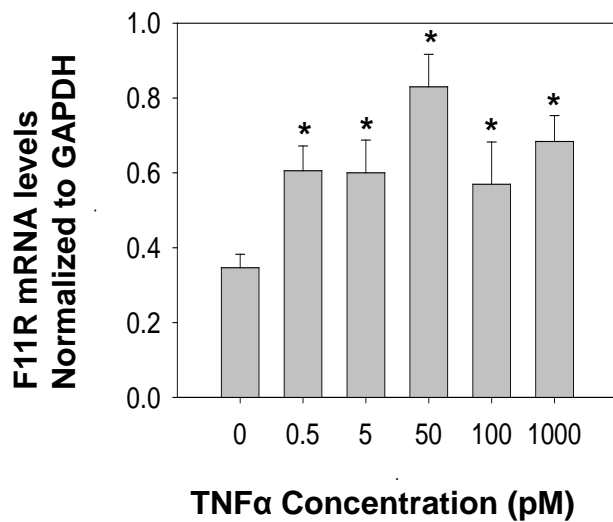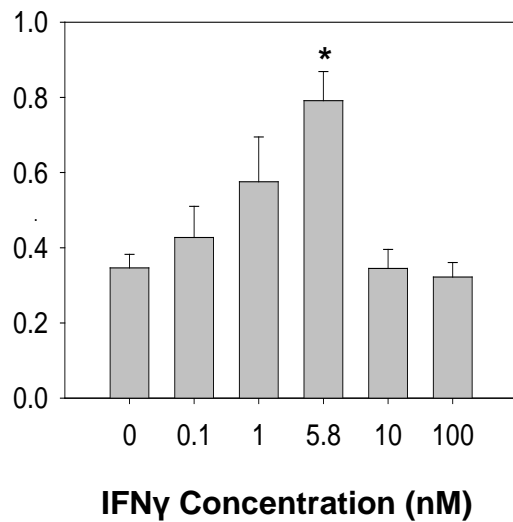

## HUVEC

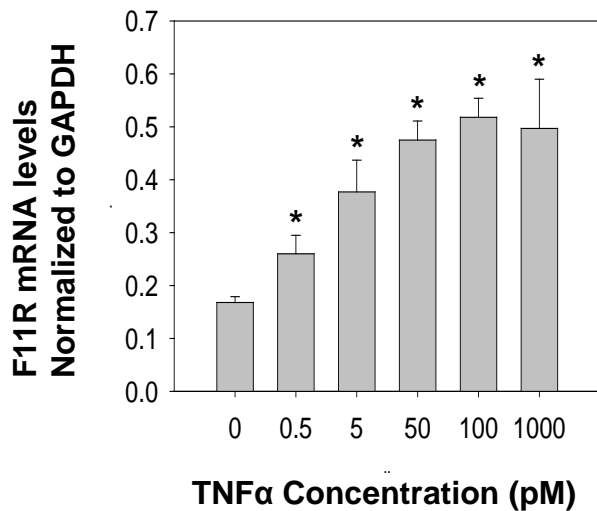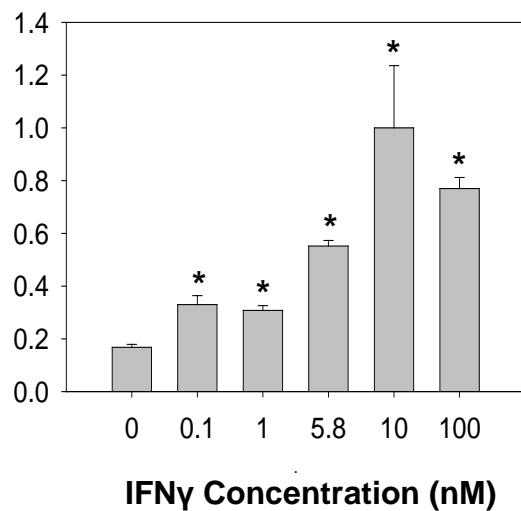

Supplement: MOESM2 [file 9577474]
